# Supplementary material
Source: publisher site journal article supplement (https://www.degruyterbrill.com/publication/isbn/9783110364767/downloadAsset/9783110364767_Holzberg_Inhalt.pdf)
Supplement: Supplementary file 1 [file 9783110364767_Holzberg_Inhalt.pdf]

## INHALT

### EINFÜHRUNG 7

Elegische Liebe – ein literarisches Konstrukt 8

AMOR vs. ROMA 12

Von Sulmo nach Tomi 14

Gegenwelt als *monde à l'envers* 16

Das Spiel mit der Gattung 20

*Arte allusiva* und Selbstreflexion 23

Psychologische Fallstudie 28

»Liebeserfahrungen« revidiert 32

### TEXT UND ÜBERSETZUNG 37

Erstes Buch 38

Zweites Buch 89

Drittes Buch 143

### ERLÄUTERUNGEN 199

### SELBSTREZEPTION UND SELBSTREFLEXION – DIE *AMORES* ALS GRUNDBAUSTEIN DES OVIDISCHEN LEBENSWERKES 235

*Amores* als Antwort auf *pascua* 237

Noch auf Stufe 1: Die *Epistulae Heroidum* 1–15 als *Amores*  
aus weiblicher Sicht 240

Stufe 2: Liebeskunst und Liebestherapie statt  
Landbau 246

Stufe 3a: *Amores* in den *Metamorphosen* 251

Stufe 3b: Die *Fasti* zwischen elegischem und  
augusteischem Diskurs 258

Unerwünschtes Nachspiel: die Exilelegien 263

Literaturhinweise zu diesem Aufsatz 267

|               |     |
|---------------|-----|
| BIBLIOGRAPHIE | 269 |
|---------------|-----|
